# Supplementary material for: Camel Grass Phenolic Compounds: Targeting Inflammation and Neurologically Related Conditions
Source: MDPI journal article supplement (doi:10.3390/molecules27227707), 2022-11-09
Supplement: s1 [file s1]

**Table S1.** Calibration curves of authentic standards used for quantification of different phenolic compounds.

| Standards                                           | Calibration curve      | $r^2$  | LOD (mg/mL) <sup>a</sup> | LOQ (mg/mL) <sup>b</sup> |
|-----------------------------------------------------|------------------------|--------|--------------------------|--------------------------|
| 3-Caffeoylquinic acid ( <b>1</b> )                  | $y = 69518x - 47.24$   | 0.9998 | 0.000095                 | 0.000318                 |
| 4-Caffeoylquinic acid ( <b>2</b> )                  | $y = 64021x + 34.62$   | 0.9996 | 0.007381                 | 0.024602                 |
| Caffeic acid                                        | $y = 136046x + 102.37$ | 0.9992 | 0.000078                 | 0.000259                 |
| Chlorogenic acid ( <b>4</b> )                       | $y = 57186x + 844.05$  | 0.9950 | 0.000571                 | 0.001905                 |
| <i>p</i> -Coumaric acid ( <b>7</b> )                | $y = 111714x - 358.62$ | 0.9987 | 0.000867                 | 0.002889                 |
| Ferulic acid ( <b>9</b> )                           | $y = 136245x + 75.344$ | 0.9996 | 0.000488                 | 0.001627                 |
| Isoorientin ( <b>12</b> )                           | $y = 104640x - 350.48$ | 0.9965 | 0.000689                 | 0.002295                 |
| Luteolin-3',7-di- <i>O</i> -glycoside ( <b>14</b> ) | $y = 49540x + 228.19$  | 0.9990 | 0.001162                 | 0.003875                 |
| Vitexin                                             | $y = 51676x + 343.74$  | 0.9974 | 0.000916                 | 0.003054                 |

<sup>a</sup>LOD: limit of detection. <sup>b</sup> LOQ: limit of quantification.
